# Supplementary material for: Built-in electric field in compositionally graded (1 − x)Ba(Zr0.2Ti0.8)O3–x(Ba0.7Ca0.3)TiO3 thin films
Source: Royal Society of Chemistry journal article supplement (doi:10.1039/c5ra06939d), 2015-01-01
Supplement: c5ra06939d1.pdf [file c5ra06939d1.pdf]

## Supplementary Information

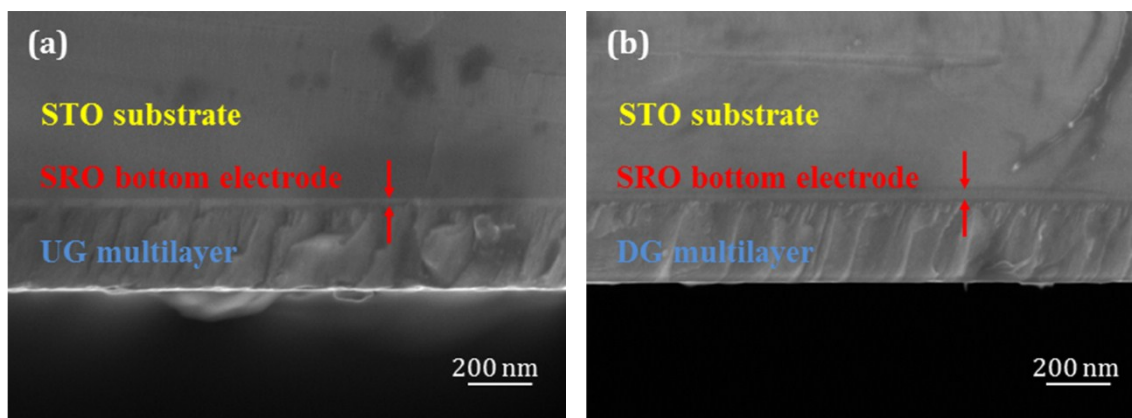

Figure S1 Cross-sectional view of the SEM images for (a) UG and (b) DG multilayers.

Cross-sectional morphologies of UG and DG multilayers are shown in Figure S1. The STO/SRO and SRO/multilayer interfaces are well-defined. However, no obvious layered structure is visible in both multilayers, probably due to the interdiffusion between layers as mentioned in the manuscript. It can be seen that the DG multilayer shows a typical columnar structure throughout the thickness, while the UG structure presents a columnar-like morphology with some granular structure. The difference in cross-sectional morphology can be attributed to the gradient direction-induced differences at interface between multilayer and substrate, top and bottom layers, strain gradient and so forth.
